# Supplementary material for: High-performance organic light-emitting diodes with natural white emission based on thermally activated delayed fluorescence emitters
Source: Royal Society of Chemistry journal article supplement (doi:10.1039/d0tc01025a), 2020-01-01
Supplement: d0tc01025a1.pdf [file d0tc01025a1.pdf]

# Supporting Information

## High-Performance Organic Light-Emitting Diodes with Natural White Emission Based on Thermally Activated Delayed Fluorescence Emitters

Wei Luo,<sup>a</sup> Tong-Tong Wang,<sup>a</sup> Xing Chen,<sup>a</sup> Kai-Ning Tong,<sup>a</sup> Wei He,<sup>a</sup> Shuang-Qiao Sun,<sup>a</sup> Yi-Jie Zhang,<sup>a</sup> Liang-Sheng Liao<sup>ab</sup> and Man-Keung Fung<sup>\*ab</sup>

<sup>a</sup> Jiangsu Key Laboratory for Carbon-Based Functional Materials & Devices, Institute of Functional Nano & Soft Materials (FUNSOM), Soochow University, Suzhou, Jiangsu 215123, P. R. China. E-mail: mkfung@suda.edu.cn

<sup>b</sup> Institute of Organic Optoelectronics (IOO), Jiangsu Industrial Technology Research Institute (JITRI), 1198 Fenu Dadao, Wujiang, Suzhou, Jiangsu, P. R. China

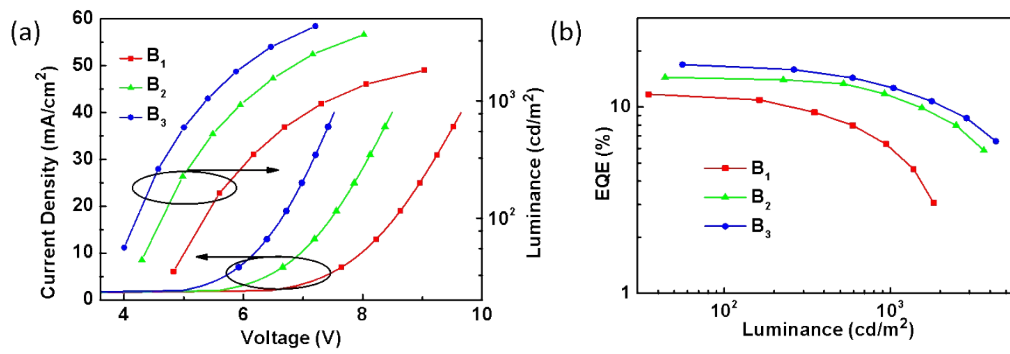

**Figure S1.** (a) Current density-voltage-luminance characteristics of devices B<sub>1</sub>-B<sub>3</sub>. (b) EQE-luminance characteristics of these devices.

**Table S1.** Summary of the blue device performance.

| Device         | V <sub>on</sub> (V) <sup>a</sup> | Concentration | EQE <sub>max</sub> (%) <sup>b</sup> | PE <sub>max</sub> (lm/W) <sup>b</sup> | CE <sub>max</sub> (cd/A) <sup>b</sup> | CIE (X, Y) <sup>c</sup> |
|----------------|----------------------------------|---------------|-------------------------------------|---------------------------------------|---------------------------------------|-------------------------|
| B <sub>1</sub> | 4.42                             | 10%           | 11.7                                | 11.4                                  | 17.5                                  | (0.16, 0.20)            |
| B <sub>2</sub> | 4.26                             | 15%           | 14.5                                | 16.1                                  | 22.7                                  | (0.16, 0.21)            |
| B <sub>3</sub> | 3.91                             | 20%           | 16.9                                | 22.0                                  | 28.0                                  | (0.16, 0.22)            |

<sup>a</sup>V<sub>on</sub> is the voltage at 0.2 mA/cm<sup>2</sup>, <sup>b</sup>Maximum external quantum efficiency, maximum power efficiency and maximum current efficiency; <sup>c</sup>Commission Internationale de L'Eclairage measured at 1000 cd/m<sup>2</sup>.

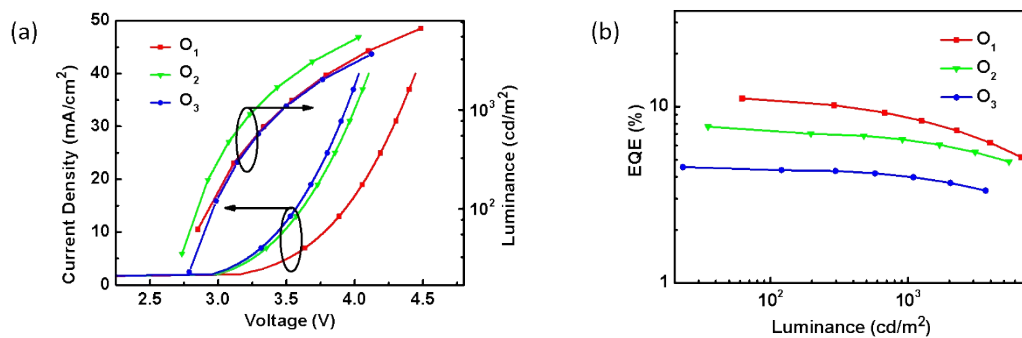

**Figure S2.** (a) Current density-voltage-luminance characteristics of devices O<sub>1</sub>-O<sub>3</sub>. (b) EQE-luminance characteristics of these devices

**Table S2.** Summary of the orange devices.

| Device         | $V_{on}$ (V) <sup>a</sup> | Concentration | $EQE_{max}$ (%) <sup>b</sup> | $PE_{max}$ (lm/W) <sup>b</sup> | $CE_{max}$ (cd/A) <sup>b</sup> | CIE (X, Y) <sup>c</sup> |
|----------------|---------------------------|---------------|------------------------------|--------------------------------|--------------------------------|-------------------------|
| O <sub>1</sub> | 2.85                      | 1%            | 11.1                         | 35.6                           | 32.0                           | (0.43, 0.47)            |
| O <sub>2</sub> | 2.73                      | 3%            | 7.7                          | 22.1                           | 21.5                           | (0.49, 0.49)            |
| O <sub>3</sub> | 2.78                      | 6%            | 4.5                          | 13.0                           | 12.5                           | (0.53, 0.47)            |

<sup>a</sup> $V_{on}$  is the voltage at 0.2 mA/cm<sup>2</sup>, <sup>b</sup>Maximum external quantum efficiency, maximum power efficiency and maximum current efficiency; <sup>c</sup>Commission Internationale de L'Eclairage measured at 1000 cd/m<sup>2</sup>.

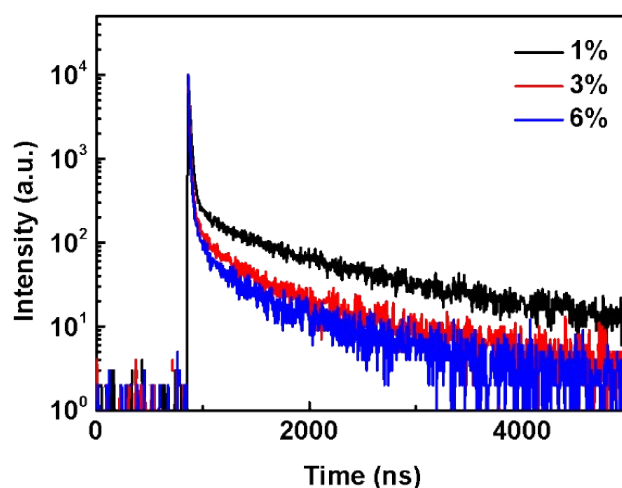**Figure S3.** Transient photoluminescence decay curves of 4CzTPN-Ph doped in DMAC-DPS with doping concentrations of 1, 3, and 6 wt% measured at 470 nm with an excitation wavelength of 350 nm.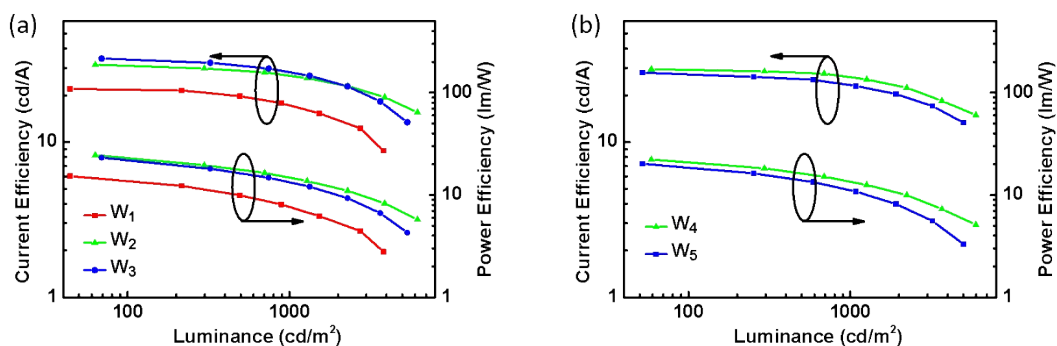**Figure S4.** Current efficiency-luminance-power efficiency characteristics of devices: (a) W<sub>1</sub>, W<sub>2</sub> and W<sub>3</sub>. (b). W<sub>4</sub> and W<sub>5</sub>.

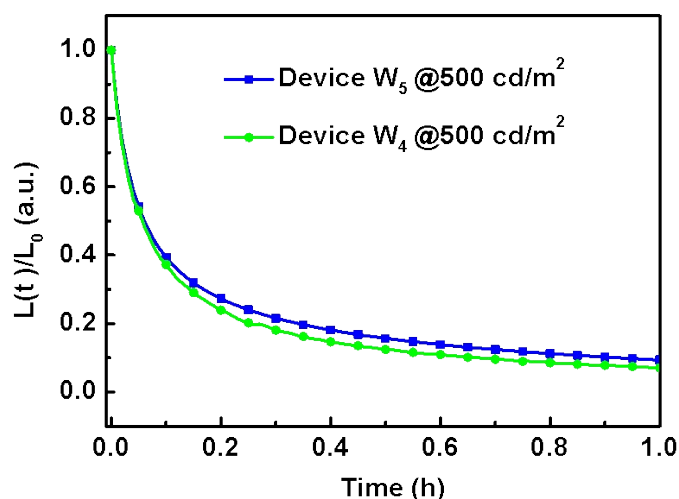

**Figure S5.** Devices lifetime of  $W_4$  and  $W_5$  at  $500 \text{ cd/m}^2$ .

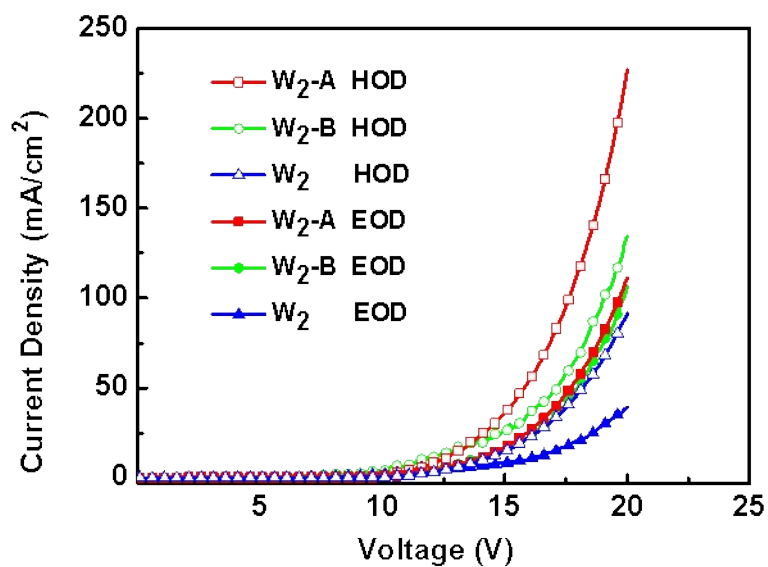

**Figure S6.** Current density-voltage characteristics of the hole-only devices (HOD) with the structure of ITO/HAT-CN (10 nm)/TAPC (40 nm)/EML (based on  $W_5$ ,  $W_5$ -A and  $W_5$ -B)/TAPC (40 nm) /HAT-CN (10 nm)/Al (120 nm), and electron-only devices (EOD) with the structure of ITO/BPhen (40 nm)/EML (based on  $W_5$ ,  $W_5$ -A and  $W_5$ -B)/ BPhen (40 nm) /Liq (2 nm)/Al (120 nm).

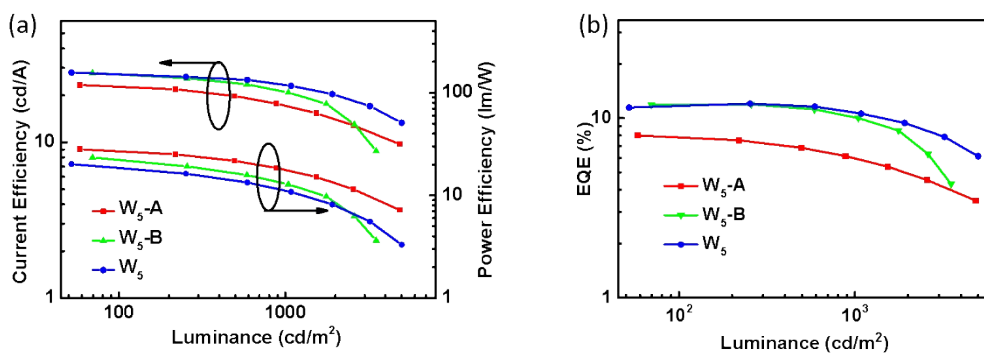

**Figure S7.** (a) Current efficiency-luminance-power efficiency characteristics of W<sub>5</sub>-A, W<sub>5</sub>-B and W<sub>5</sub>. (b) EQE-luminance characteristics of the three device.
